# Supplementary material
Source: publisher figshare collection journal article supplement (https://acs.figshare.com/ndownloader/files/4669396)
Supplement: Supplementary file 1 [file 4669396]

SUPPLEMENTARY MATERIAL

for the  
article  
entitled

**Studies on A Urea Directed Stork-Crabtree Hydrogenation. Synthesis of C1-C9  
Subunit of (+)-Zincophorin.**

authored by

Zhenlei Song, Richard P. Hsung\*, Ting Lu, and Andrew G. Lohse

*Division of Pharmaceutical Sciences and Department of Chemistry  
7111 Rennebohm Hall, 777 Highland Avenue  
University of Wisconsin at Madison  
Madison, WI 53705-2222*

**Contents of Supporting Information**

|                                                              |         |
|--------------------------------------------------------------|---------|
| Synthesis of Allenamide <b>9</b> .                           | S2      |
| Synthesis of Aldehyde <b>15</b> .                            | S3      |
| Synthesis of Chiral Enone <b>16</b> .                        | S4      |
| The Hetero [4 + 2] Cycloadditions and Hydrogenations.        | S5-S12  |
| Crotylations and Oxidations of <b>26</b> .                   | S12     |
| Esterification of <b>51a</b> and <b>51b</b> .                | S14     |
| Dihydroxylation of <b>52</b> .                               | S14     |
| Intercepting Cossy's Intermediate.                           | S15     |
| Matching of Our Aldehyde <b>6</b> with Cossy's Intermediate. | S16     |
| <sup>1</sup> H NMR and <sup>13</sup> C NMR spectra.          | S18-S64 |
| Cosy and NOE experiment of Compound <b>26</b> .              | S65-S74 |
| Cosy and NOE experiment of Compound <b>45</b> .              | S75-S87 |
| X-ray of Compounds <b>18</b> and <b>27</b> .                 | S88     |

## EXPERIMENTAL SECTION

All reactions were performed in flame-dried glassware under a nitrogen atmosphere. Solvents were distilled prior to use. Reagents were used as purchased (Aldrich, Acros), except where noted. Chromatographic separations were performed using Bodman 60 Å SiO<sub>2</sub>. <sup>1</sup>H and <sup>13</sup>C NMR spectra were obtained on Varian VI-300, VI-400, and VI-500 spectrometers using CDCl<sub>3</sub> (except where noted) with TMS or residual CHCl<sub>3</sub> in the solvent as standard. Melting points were determined using a Laboratory Devices MEL-TEMP and are uncorrected/calibrated. Infrared spectra were obtained using NaCl plates on a Bruker Equinox 55/S FT-IR Spectrophotometer, and relative intensities are expressed qualitatively as s (strong), m (medium), and w (weak). TLC analysis was performed using Aldrich 254 nm polyester-backed plates (60 Å, 250 μm) and visualized using UV and a suitable chemical stain. Low-resolution mass spectra were obtained using an Agilent-1100-HPLC/MSD and can be either APCI or ESI, or an IonSpec HiRes-MALDI FT-Mass Spectrometer. High-resolution mass spectral analyses were performed at University of Wisconsin Mass Spectrometry Laboratories. All spectral data obtained for new compounds are reported. X-Ray analyses were performed at the X-Ray facility in University of Minnesota.

### Synthesis of Allenamide 9.

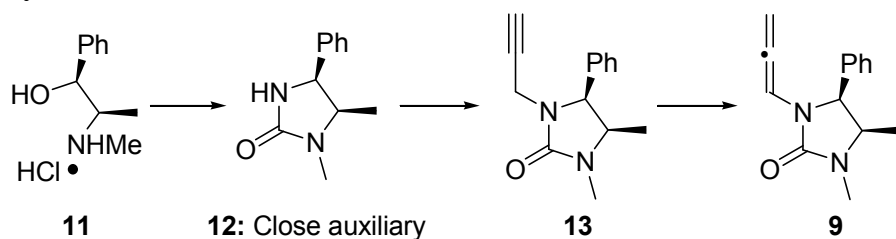

The (+)-ephedrine hydrochloride salt (17.0 g, 84.6 mmol) was mixed with urea (15.0 g, 253.8 mmol) and heated for 0.5 h at 170-175 °C followed by 1 h at 200-210 °C. The cooled mixture was treated with H<sub>2</sub>O, and the somewhat oily solid precipitated was washed with 5% aq HCl and H<sub>2</sub>O to get rid of the excess urea. Crystallization from 80% ethanol provided **12** (7.50 g, 48%) as a white solid.

To a solution of **12** (7.00 g, 36.8 mmol) in anhyd DMF (70 mL) was added NaH (60%w/w in mineral oil, 2.3 g, 55.2 mmol) in small portion at 0°C. After stirring for 1 h under N<sub>2</sub> at rt, the mixture was cooled to 0°C. Then propargyl bromide (6.5 mL, 73.6 mmol) was added dropwise over 30 min. After stirring for an additional 2 h, all the starting material **12** was consumed as evident by TLC analysis. Then the mixture was poured into ice water (40 mL) carefully, and extracted thoroughly with EtOAc (3 × 50 mL). The combined organic phases were washed with sat aq NaCl (3 × 30 mL), dried over Na<sub>2</sub>SO<sub>4</sub>, and concentrated under reduced pressure. Purification of the crude residue via silica gel flash column chromatography (gradient eluent: 20-50% EtOAc in hexanes with 10% CH<sub>2</sub>Cl<sub>2</sub>) afforded pure propargyl amide **13** (8.20 g, 98%) of as a brown solid. **13**: *R*<sub>f</sub> = 0.20 [33% EtOAc/hexanes]; mp 70-72 °C; [*α*]<sub>D</sub><sup>25</sup> = +123.1 ° [*c* 2.0, CH<sub>2</sub>Cl<sub>2</sub>]; <sup>1</sup>H NMR (400 MHz, CDCl<sub>3</sub>) δ 0.75 (d, 3H, *J* = 6.4 Hz), 2.14 (t, 1H, *J* = 2.4 Hz), 2.80 (s, 3H), 3.35 (dd, 1H, *J* = 2.4, 17.6 Hz), 3.80 (dq, 1H, *J* = 6.4, 8.8 Hz), 4.51 (dd, 1H, *J* = 2.4, 17.6 Hz), 7.18-7.20 (m, 3H), 7.30-7.38 (m, 3H); <sup>13</sup>C NMR (100

MHz, CDCl<sub>3</sub>)  $\delta$  14.7, 28.9, 32.3, 55.9, 61.3, 72.3, 78.5, 128.2, 128.5, 128.9, 135.5, 160.8; IR (neat) cm<sup>-1</sup> 3226m, 2975m, 1697s, 1480m, 1437s, 1402s, 1365m; mass spectrum (APCI): m/e (% relative intensity) 229.2 (100) (M+H)<sup>+</sup>, 191.2 (5); HRMS (MALDI) calcd for C<sub>14</sub>H<sub>17</sub>ON (M+H)<sup>+</sup> 229.1335, found 229.1334.

To a solution of propargyl amide **13** (2.50 g, 11.0 mol) in anhyd THF (20 mL) was added *t*-BuOK (250.0 mg, 2.20 mmol) at 0 °C and the color of reaction turned into black. After stirring for 2 h under N<sub>2</sub> at rt, the mixture was filtered through a bed of Celite<sup>TM</sup> and diluted with EtOAc (50 mL). The mixture was washed with water (3  $\times$  15 mL), dried over Na<sub>2</sub>SO<sub>4</sub> and charcoal (to get rid of the color). Concentration under reduced pressure afforded **9** (2.40 g, 95%) as a yellow solid. **9**: *R*<sub>f</sub> = 0.30 [33% EtOAc/hexanes]; mp 97-100 °C; [ $\alpha$ ]<sub>D</sub><sup>25</sup> = + 105.2 ° [*c* 1.60, CH<sub>2</sub>Cl<sub>2</sub>]; <sup>1</sup>H NMR (500 MHz, CDCl<sub>3</sub>)  $\delta$  0.78 (d, 3H, *J* = 7.0 Hz), 2.81 (s, 3H), 3.85 (dq, 1H, *J* = 6.5, 9.0 Hz), 4.70 (d, 1H, *J* = 9.0 Hz), 4.79 (dd, 1H, *J* = 6.0, 9.0 Hz), 5.08 (dd, 1H, *J* = 6.5, 9.0 Hz), 7.00 (dd, 1H, *J* = 6.5, 6.5 Hz), 7.10 (dd, 2H, *J* = 2.0, 9.0 Hz), 7.27-7.33 (m, 3H); <sup>13</sup>C NMR (125 MHz, CDCl<sub>3</sub>)  $\delta$  15.3, 29.1, 55.9, 61.2, 86.9, 96.7, 128.2, 128.5, 136.4, 158.2, 202.7; IR (neat) cm<sup>-1</sup> 1689s, 1455m, 1420s, 1397s; mass spectrum (APCI): m/e (% relative intensity) 229.2 (100) (M+H)<sup>+</sup>, 191.2 (15); HRMS (MALDI) calcd for C<sub>14</sub>H<sub>17</sub>ON (M+H)<sup>+</sup> 229.1335, found 229.1333.

### Synthesis of Aldehyde **15**.

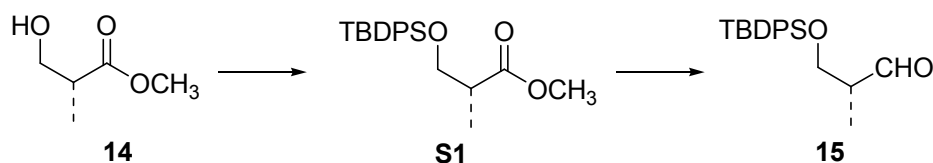

To a solution of **14** (5.00 g, 42.3 mmol) and imidazole (6.20 g, 91.8 mmol) in anhyd DMF (2 mL) was added TBDPSCl (12.2 g, 44.2 mol) at 0 °C. After stirring for 2 h under N<sub>2</sub> at rt, all the starting material **14** was consumed as evident via TLC analysis. Then the mixture was poured into water (40 mL), and extracted thoroughly with Et<sub>2</sub>O (3  $\times$  80 mL). The combined organic phases were washed with sat aq NaCl (2  $\times$  40 mL), dried over Na<sub>2</sub>SO<sub>4</sub>, and concentrated under reduced pressure. Purification of the crude residue via silica gel flash column chromatography (gradient eluent: 5-10% EtOAc in hexanes) afforded pure silyl ether **S1** (14.1 g, 94%) of as a colorless oil. **S1**: *R*<sub>f</sub> = 0.50 [10% EtOAc/hexanes]; <sup>1</sup>H NMR (400 MHz, CDCl<sub>3</sub>)  $\delta$  1.05 (s, 9H), 1.17 (d, 3H, *J* = 7.0 Hz), 2.74 (ddq, 1H, *J* = 7.2, 7.2, 7.2 Hz), 3.70 (s, 3H), 3.74 (dd, 1H, *J* = 5.6, 10.0 Hz), 3.85 (dd, 1H, *J* = 7.2, 10.0 Hz), 7.37-7.46 (m, 6H), 7.67-7.69 (m, 4H); <sup>13</sup>C NMR (100 MHz, CDCl<sub>3</sub>)  $\delta$  13.5, 19.2, 26.7, 42.4, 51.5, 65.9, 127.6, 129.6, 133.5, 133.7, 135.6, 175.3.

To a solution of silyl ether **S1** (3.00 g, 8.5 mmol) in anhyd CH<sub>2</sub>Cl<sub>2</sub> (30 mL) was added DIBAL-H (1.0 M in Hexanes, 9 mL, 9.0 mmol) dropwise over 8 min at -78 °C. After stirring for an additional 6 h at -78 °C, the reaction was quenched by adding MeOH (3 mL) via syringe pump dropwise to maintain the temperature below -70 °C. Then the resulting mixture was warmed up to rt

slowly and poured into sat aq potassium-sodium tartrate solution (30 mL). The mixture was vigorously stirred at rt until the phase separation occurred and the aqueous layer was extracted thoroughly with CH<sub>2</sub>Cl<sub>2</sub> (3 × 25 mL). The combined organic phases were washed with sat aq NaCl (2 × 15 mL), dried over Na<sub>2</sub>SO<sub>4</sub>, and concentrated under reduced pressure. Purification of the crude residue via silica gel flash column chromatography (gradient eluent: 5-10% EtOAc in hexanes) afforded pure aldehyde **15** (2.7 g, 97%) as a colorless oil. **15**: *R*<sub>f</sub> = 0.50 [10% EtOAc/hexanes]; <sup>1</sup>H NMR (400 MHz, CDCl<sub>3</sub>) δ 1.04 (s, 9H), 1.09 (d, 3H, *J* = 6.8 Hz), 2.65 (m, 1H), 3.68 (s, 3H), 3.83 (dd, 1H, *J* = 6.0, 10.4 Hz), 3.90 (dd, 1H, *J* = 4.8, 10.4 Hz), 7.36-7.43 (m, 6H), 7.63-7.66 (m, 4H), 9.76 (dd, 1H, *J* = 1.6, 1.6 Hz); <sup>13</sup>C NMR (100 MHz, CDCl<sub>3</sub>) δ 10.5, 19.5, 27.0, 49.1, 64.4, 128.0, 130.0, 133.4, 135.8, 204.6.

### Synthesis of Chiral Enone **16**.

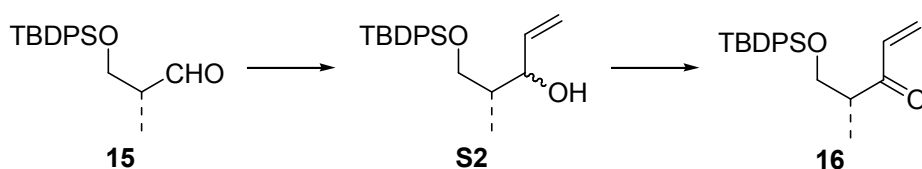

To a solution of vinyl magnesium bromide (1.0 *M*, 48.0 mL, 48.0 mmol) was added a solution of aldehyde **15** (12.0 g, 36.8 mmol) in anhyd THF (50 mL) dropwise over 15 min at −78 °C. After stirring for 5 min under N<sub>2</sub> at −78 °C, all the starting material **15** was consumed as evident by TLC analysis. Then the mixture was poured into sat aq NH<sub>4</sub>Cl (100 mL), and extracted with Et<sub>2</sub>O (2 × 100 mL). The combined organic phases were washed with sat aq NaCl (2 × 30 mL), dried over Na<sub>2</sub>SO<sub>4</sub>, and concentrated under reduced pressure. Purification of the crude residue via silica gel flash column chromatography (gradient eluent: 5-20% EtOAc in hexanes) afforded allyl alcohol **S2** (10.8 g, 83%) of as a colorless oil.

To a solution of oxalyl chloride (2.80 mL, 30.8 mmol) in anhyd CH<sub>2</sub>Cl<sub>2</sub> (70 mL) was added a solution of Me<sub>2</sub>SO (4.60 mL, 61.6 mmol) in anhyd CH<sub>2</sub>Cl<sub>2</sub> (15 mL) dropwise at −78 °C. The reaction mixture was stirred for 5 min at this temperature and a solution of the above allyl alcohol **S2** (10.0 g, 28.2 mmol) in anhyd CH<sub>2</sub>Cl<sub>2</sub> (20 mL) was added over 10 min. After stirring for an additional 1 h, triethylamine (20.0 mL, 142.8 mmol) was added dropwise at −78 °C. The mixture was stirred for 10 min and then allowed to warm to around −20 °C. Then the mixture was poured into water, and extracted with CH<sub>2</sub>Cl<sub>2</sub> (2 × 100 mL). The combined organic phases were washed with sat aq NH<sub>4</sub>Cl (3 × 50 mL) and water (2 × 50 mL), dried over Na<sub>2</sub>SO<sub>4</sub>, and concentrated under reduced pressure. Purification of the crude residue via silica gel flash column chromatography (gradient eluent: 3-5% EtOAc in hexanes) afforded pure chiral enone **16** (8.00 g, 80%) as a colorless oil. **16**: *R*<sub>f</sub> = 0.50 [10% EtOAc/hexanes]; [α]<sub>D</sub><sup>25</sup> = −18.1° [*c* 1.40, CH<sub>2</sub>Cl<sub>2</sub>]; <sup>1</sup>H NMR (400 MHz, CDCl<sub>3</sub>) δ 1.02 (s, 9H), 1.08 (d, 3H, *J* = 6.8 Hz), 3.12 (ddq, 1H, *J* = 7.2, 7.2, 7.2 Hz), 3.67 (dd, 1H, *J* = 5.6, 10.0 Hz), 3.87 (dd, 1H, *J* = 7.2, 10.0 Hz), 5.76 (dd, 1H, *J* = 1.2, 10.6 Hz), 6.23 (dd, 1H, *J* = 1.2, 17.6 Hz), 6.44 (dd, 1H, *J* = 10.4, 17.5 Hz), 7.36-7.44 (m, 8H), 7.62-7.66 (m, 2H); <sup>13</sup>C NMR (100 MHz, CDCl<sub>3</sub>) δ 13.5, 19.5, 27.0,

46.0, 66.3, 127.9, 128.3, 129.9, 133.6, 133.7, 135.8, 135.9, 136.1, 203.1; IR (neat)  $\text{cm}^{-1}$  2931s, 1698s, 1679s, 1611m, 1472m, 1427s, 1361s; mass spectrum (APCI):  $m/e$  (% relative intensity) 275 (100)  $(\text{M-Ph+H})^+$ , 229.2 (22); HRMS (MALDI) calcd for  $\text{C}_{22}\text{H}_{28}\text{O}_2\text{NaSi}$   $(\text{M+Na})^+$  375.1751, found 375.1752.

### The Hetero [4 + 2] Cycloadditions and Hydrogenations.

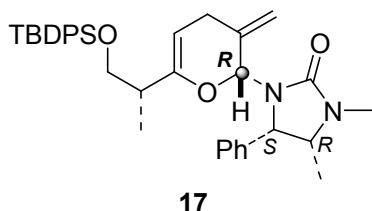

To a solution of chiral enone **16** (2.48 g, 7.03 mmol) in anhyd  $\text{CH}_3\text{CN}$  (50 mL) was added allenamide **9** (2.22 g, 9.72 mmol). This reaction mixture was sealed in sealed-tube equipped under  $\text{N}_2$  and heated up to 90 °C for 2 d. Concentration under reduced pressure and purification of the crude residue via silica gel flash column chromatography (gradient eluent: 10-20% EtOAc in hexanes) afforded pure cycloadduct **17** (1.96 g, 58% based on recovery of 17% **16**) of as a colorless oil. **17**:  $R_f$  = 0.50 [33% EtOAc/hexanes];  $[\alpha]_{\text{D}}^{25} = -100.4^\circ$  [ $c$  1.00,  $\text{CH}_2\text{Cl}_2$ ];  $^1\text{H}$  NMR (500 MHz,  $\text{CDCl}_3$ )  $\delta$  0.59 (d, 3H,  $J = 6.5$  Hz), 1.11 (d, 3H,  $J = 6.5$  Hz), 1.13 (s, 9H), 2.23 (dd, 1H,  $J = 2.5, 20.5$  Hz), 2.39 (m, 1H), 2.51 (dd, 1H,  $J = 4.0, 20.0$  Hz), 2.71 (s, 3H), 3.56-3.63 (m, 2H), 3.84 (dd, 1H,  $J = 6.5, 10.0$  Hz), 4.52 (dd, 1H,  $J = 3.6, 4.0$  Hz), 4.78 (s, 1H), 4.86 (d, 1H,  $J = 8.5$  Hz), 5.03 (s, 1H), 6.26 (s, 1H), 7.09-7.10 (m, 2H), 7.24-7.28 (m, 3H), 7.42-7.52 (m, 6H), 7.71-7.74 (m, 4H);  $^{13}\text{C}$  NMR (125 MHz,  $\text{CDCl}_3$ )  $\delta$  14.7, 14.8, 19.3, 26.9, 26.8, 28.6, 41.3, 56.7, 59.5, 66.5, 80.9, 94.4, 114.7, 127.59, 127.63, 127.68, 127.7, 129.50, 129.57, 133.8, 134.2, 135.46, 135.54, 135.59, 137.78, 137.98, 154.3, 161.4; IR (neat)  $\text{cm}^{-1}$  2957s, 1710s, 1456m, 1396s, 1361s; mass spectrum (APCI):  $m/e$  (% relative intensity) 581.2 (25)  $(\text{M+H})^+$ , 439.3 (100), 405.2 (80), 279.2 (50), 191.2 (75), 101.1 (75); HRMS (MALDI) calcd for  $\text{C}_{36}\text{H}_{45}\text{N}_2\text{O}_3\text{Si}$   $(\text{M+H})^+$  581.3199, found 581.3761.

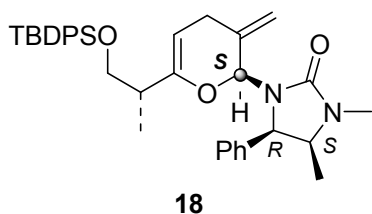

To a solution of enone **16** (248.0 mg, 0.70 mmol) in anhyd  $\text{CH}_3\text{CN}$  (5 mL) was added allenamide *ent*-**9** (221.0 mg, 0.97 mmol). This reaction mixture was sealed in sealed-tube equipped under  $\text{N}_2$  and heated up to 90 °C for 2 d. Concentration under reduced pressure and purification of the crude residue via silica gel flash column chromatography (gradient eluent: 10-20% EtOAc in hexanes) afforded pure **18** (190.0 mg, 54% based on recovery of 13% **16**) of as a colorless oil (white solid can be recrystallized from Hexanes). **18**:  $R_f$  = 0.50 [33% EtOAc/hexanes]; mp 75-76 °C;  $[\alpha]_{\text{D}}^{23} = +72.6^\circ$  [ $c$  2.35,  $\text{CH}_2\text{Cl}_2$ ];  $^1\text{H}$  NMR (400 MHz,  $\text{CDCl}_3$ )  $\delta$  0.58 (d, 3H,  $J = 6.4$  Hz), 1.05 (s, 9H), 1.09 (d, 3H,  $J =$

6.8 Hz), 2.14 (dd, 1H,  $J = 2.8, 20.4$  Hz), 2.39 (m, 1H), 2.47 (dd, 1H,  $J = 4.0, 20.4$  Hz), 2.64 (s, 3H), 3.52 (dq, 1H,  $J = 8.4, 6.4$  Hz), 3.58 (dd, 1H,  $J = 7.2, 9.6$  Hz), 3.78 (dd, 1H,  $J = 6.0, 9.6$  Hz), 4.46 (t, 1H,  $J = 3.6$  Hz), 4.74 (t, 1H,  $J = 1.0$  Hz), 4.75 (d,  $J = 8.4$  Hz), 4.98 (s, 1H), 6.20 (s, 1H), 7.04-7.06 (m, 2H), 7.20-7.22 (m, 3H), 7.35-7.43 (m, 6H), 7.64-7.68 (m, 4H);  $^{13}\text{C}$  NMR (100 MHz,  $\text{CDCl}_3$ )  $\delta$  15.1, 15.2, 19.6, 27.0, 27.2, 28.9, 41.2, 57.0, 59.9, 66.7, 81.1, 94.6, 115.0, 127.84, 127.86, 127.9, 128.1, 129.75, 129.80, 134.1, 134.4, 135.75, 135.84, 135.88, 138.0, 138.2, 154.7, 161.7; IR (neat)  $\text{cm}^{-1}$  2930s, 2856s, 1708s, 1472m, 1425s, 907s; mass spectrum (APCI):  $m/e$  (% relative intensity) 581.3 (100) ( $\text{M}+\text{H}$ ) $^+$ , 567.1 (40), 201.3 (10), 101.2 (25); HRMS (ESI) calcd for  $\text{C}_{36}\text{H}_{44}\text{N}_2\text{O}_3\text{SiNa}$  ( $\text{M}+\text{Na}$ ) $^+$  603.3019, found 603.3011.

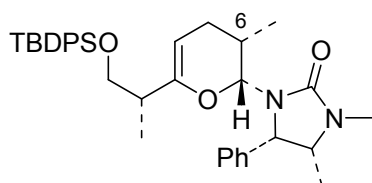

**19**

To a heterogeneous mixture of Pt/C (5%w/w, 1.40 g, 0.33 mmol) and cycloadduct **17** (3.80 g, 6.55 mmol) in MeOH (140 mL) was added  $\text{NaBH}_4$  (800.0 mg, 21.0 mmol) in small portions at 0 °C carefully over 2 min. The mixture was hydrogenated with a  $\text{H}_2$ -balloon for 2 h at rt, and after which, the catalyst was filtered and washed with MeOH (50 mL). Removing MeOH under reduced pressure and the residue was diluted with  $\text{Et}_2\text{O}$  (100 mL). This mixture was washed with water ( $2 \times 30$  mL), dried over  $\text{Na}_2\text{SO}_4$ , and concentrated under reduced pressure. Purification of the crude residue via silica gel flash column chromatography (gradient eluent: 10-17% EtOAc in hexanes) afforded pure **19** (2.40 g, 64%) as a colorless oil. **19**:  $R_f = 0.50$  [33% EtOAc/hexanes];  $[\alpha]_{\text{D}}^{25} = -29.9^\circ$  [ $c$  1.45,  $\text{CH}_2\text{Cl}_2$ ];  $^1\text{H}$  NMR (500 MHz,  $\text{CDCl}_3$ )  $\delta$  0.67 (d, 3H,  $J = 6.5$  Hz), 0.76 (d, 3H,  $J = 6.5$  Hz), 1.14-1.16 (m, 12H), 1.22 (m, 1H), 1.94-2.04 (m, 2H), 2.43 (m, 1H), 2.75 (s, 3H), 3.63 (dd, 1H,  $J = 7.0, 9.5$  Hz), 3.73 (dq, 1H,  $J = 6.5$  Hz), 3.88 (dd, 1H,  $J = 6.5, 10.0$  Hz), 4.49 (dd, 1H,  $J = 3.5, 4.0$  Hz), 4.78 (s, 1H,  $J = 8.5$  Hz), 5.83 (d, 1H,  $J = 3.5$  Hz), 7.33 (m, 4H), 7.43-7.52 (m, 7H), 7.75-7.76 (m, 4H);  $^{13}\text{C}$  NMR (125 MHz,  $\text{CDCl}_3$ )  $\delta$  14.9, 15.4, 15.6, 19.7, 27.2, 27.3, 29.0, 30.1, 41.5, 57.9, 58.8, 66.9, 83.0, 94.9, 127.89, 127.91, 127.93, 127.98, 129.84, 129.88, 134.26, 134.44, 135.87, 135.93, 139.22, 154.8, 163.5; IR (neat)  $\text{cm}^{-1}$  2960s, 1710s, 1426s, 1393s, 1363m; mass spectrum (APCI):  $m/e$  (% relative intensity) 583.0 (20) ( $\text{M}+\text{H}$ ) $^+$ , 439.4 (100), 393.3 (50), 279.2 (30), 191.2 (20), 101.1 (75); HRMS (MALDI) calcd for  $\text{C}_{36}\text{H}_{46}\text{N}_2\text{O}_3\text{SiNa}$  ( $\text{M}+\text{Na}$ ) $^+$  605.3170, found 605.3202.

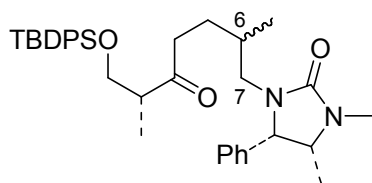

**20**

**20:**  $R_f$  = 0.30 [33% EtOAc/hexanes];  $^1\text{H}$  NMR (400 MHz,  $\text{CDCl}_3$ )  $\delta$  0.76 (d, 3H,  $J$  = 6.8 Hz), 0.77 (d, 3H,  $J$  = 6.8 Hz), 0.87 (d, 3H,  $J$  = 6.8 Hz), 0.96 (d, 3H,  $J$  = 6.8 Hz), 1.003 (d, 3H,  $J$  = 7.2 Hz), 1.007 (s, 9H), 1.02 (s, 9H), 1.03 (d, 3H,  $J$  = 6.8 Hz), 1.23-1.35 (m, 2H), 1.56-1.72 (m, 3H), 1.75-1.83 (m, 1H), 2.38-2.65 (m, 6H), 2.74 (s, 3H), 2.75 (s, 3H), 2.77-2.87 (m, 2H), 3.41-3.50 (m, 2H), 3.60-3.67 (m, 2H), 3.72-3.84 (m, 4H), 4.55 (d, 1H,  $J$  = 8.8 Hz), 4.66 (d, 1H,  $J$  = 8.8 Hz), 7.09-7.14 (m, 4H), 7.27-7.44 (m, 18H), 7.60-7.66 (m, 8H);  $^{13}\text{C}$  NMR (100 MHz,  $\text{CDCl}_3$ )  $\delta$  13.3, 13.4, 15.05, 15.10, 17.56, 17.60, 19.41, 19.43, 27.02, 27.04, 27.17, 28.01, 29.41, 30.95, 31.78, 39.57, 40.33, 47.56, 47.75, 48.71, 48.75, 56.23, 62.44, 62.85, 66.48, 66.53, 127.96, 128.34, 128.44, 128.66, 128.73, 129.97, 133.46, 133.59, 135.75, 135.80, 136.09, 136.19, 162.31, 162.38, 213.54, 213.74; IR (neat)  $\text{cm}^{-1}$  2932m, 2858m, 1698s, 1427s, 1384m; mass spectrum (APCI):  $m/e$  (% relative intensity) 585.3 (80) ( $\text{M}+\text{H}$ ) $^+$ , 329.1 (80); HRMS (MALDI) calcd for  $\text{C}_{36}\text{H}_{48}\text{N}_2\text{O}_3\text{SiNa}$  ( $\text{M}+\text{Na}$ ) $^+$  607.3326, found 607.3336.

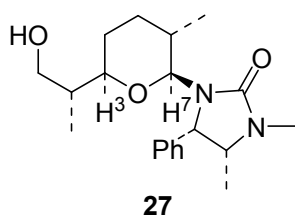

To a solution of **31** (40.0 mg, 0.068 mmol) in  $\text{CH}_3\text{CN}$  (1.2 mL) was added TBAF (1.0 M in THF, 136.0  $\mu\text{L}$ , 0.136 mmol) at 0  $^\circ\text{C}$ . This mixture was stirred for 24 h at rt, all the starting material **31** was consumed as evident by TLC analysis. The reaction was quenched by adding water (5 mL), and extracted with EtOAc (3  $\times$  10 mL). The combined organic phases were dried over  $\text{Na}_2\text{SO}_4$ , and concentrated under reduced pressure. Purification of the crude residue via silica gel flash column chromatography (gradient eluent: 20-100% EtOAc in hexanes) afforded pure **27** (18.0 mg, 78%) as a white solid. **27:**  $R_f$  = 0.20 [66% EtOAc/hexanes]; mp 141-143  $^\circ\text{C}$  [ $\alpha$ ] $_{\text{D}}^{25}$  = +98.8 $^\circ$  [ $c$  0.60,  $\text{CH}_2\text{Cl}_2$ ];  $^1\text{H}$  NMR (500 MHz,  $\text{CDCl}_3$ )  $\delta$  0.57 (d, 3H,  $J$  = 7.5 Hz), 0.80 (d, 3H,  $J$  = 7.0 Hz), 0.96 (d, 3H,  $J$  = 6.0 Hz), 1.21-1.33 (m, 3H), 1.70 (m, 1H), 1.88-1.91 (m, 2H), 2.30 (s, 1H), 2.80 (s, 3H), 3.47 (d, 2H,  $J$  = 6.0 Hz), 3.55 (dd, 1H,  $J$  = 2.5, 10.5 Hz), 3.79 (dq, 1H,  $J$  = 7.0, 8.0 Hz), 4.66-4.67 (m, 2H), 7.27-7.37 (m, 5 H);  $^{13}\text{C}$  NMR (125 MHz,  $\text{CDCl}_3$ )  $\delta$  11.2, 14.8, 17.5, 27.0, 28.9, 32.46, 32.48, 38.8, 56.8, 60.3, 66.5, 80.1, 87.9, 128.2, 128.3, 128.7, 137.8, 161.3; IR (neat)  $\text{cm}^{-1}$  3417s, 2931s, 1687s, 1434s, 1402m, 1350m; mass spectrum (APCI):  $m/e$  (% relative intensity) 347.2 ( $\text{M}+\text{H}$ ) $^+$  (100), 329.2 (20), 191.2 (10); HRMS (MALDI) calcd for  $\text{C}_{20}\text{H}_{30}\text{N}_2\text{O}_3\text{Na}$  ( $\text{M}+\text{Na}$ ) $^+$  369.2149, found 369.2152.

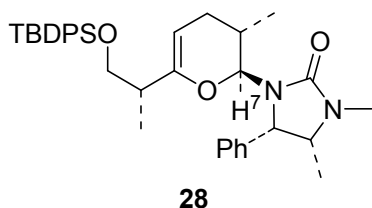

Crabtree's catalyst (2.50 mg, 0.0031 mmol) was dissolved in anhyd  $\text{CH}_2\text{Cl}_2$  (1.2 mL). This mixture was stirred under 60  $\text{psi}$   $\text{H}_2$  for 5-10 min at rt. To this solution of pre-activated Crabtree's

catalyst was added a solution of **19** (15.0 mg, 0.027 mmol) in CH<sub>2</sub>Cl<sub>2</sub> (0.3 mL) under N<sub>2</sub>. The mixture was stirred for 10 min and all the starting material **19** was consumed as evident by TLC analysis. Concentration under reduced pressure and purification of the crude residue via silica gel flash column chromatography (gradient eluent: 10-17% EtOAc in hexanes) afforded pure **28** (6.00 mg, 40%) as a colorless oil. **28**:  $R_f$  = 0.40 [33% EtOAc/hexanes];  $[\alpha]_D^{25}$  = + 43.3° [ $c$  0.40, CHCl<sub>3</sub>]; <sup>1</sup>H NMR (500 MHz, CDCl<sub>3</sub>)  $\delta$  0.67 (d, 3H,  $J$  = 7.0 Hz), 0.73 (d, 3H,  $J$  = 7.0 Hz), 0.99 (d, 3H,  $J$  = 7.0 Hz), 1.01 (s, 9H), 1.74 (dd, 1H,  $J$  = 10.5, 16.5 Hz), 2.02 (ddd, 1H,  $J$  = 6.0, 6.0, 17.0 Hz), 2.11 (dd, 1H,  $J$  = 7.0, 13.5 Hz), 2.25 (m, 1H), 2.78 (s, 3H), 3.19 (dd, 1H,  $J$  = 7.5, 9.5 Hz), 3.49 (dd, 1H,  $J$  = 6.0, 9.5 Hz), 3.73 (m, 1H), 4.30 (d, 1H,  $J$  = 4.0 Hz), 4.65 (d, 1H,  $J$  = 8.5 Hz), 4.95 (d, 1H,  $J$  = 10.0 Hz), 7.10 (m, 4H), 7.36-7.43 (m, 7H), 7.60-7.70 (m, 4H); <sup>13</sup>C NMR (125 MHz, CDCl<sub>3</sub>)  $\delta$  14.7, 14.8, 17.4, 19.5, 27.1, 28.9, 29.2, 30.1, 41.0, 56.6, 60.0, 66.6, 85.5, 94.6, 127.7, 127.8, 127.84, 127.9, 128.0, 128.5, 129.6, 129.7, 134.4, 134.6, 135.9, 135.91, 137.6, 155.3, 160.8; IR (neat) cm<sup>-1</sup> 2930m, 2856m, 1712s, 1428s, 1389m; mass spectrum (APCI):  $m/e$  (% relative intensity) 583.2 (100) (M+H)<sup>+</sup>, 327.2 (80), 231.2 (30); HRMS (MALDI) calcd for C<sub>36</sub>H<sub>46</sub>N<sub>2</sub>O<sub>3</sub>SiNa (M+Na)<sup>+</sup> 605.3170, found 605.3168.

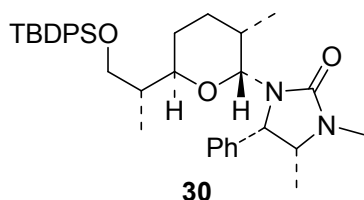

**30**:  $R_f$  = 0.50 [33% EtOAc/hexanes]; <sup>1</sup>H NMR (500 MHz, CDCl<sub>3</sub>)  $\delta$  0.63 (d, 3H,  $J$  = 6.0 Hz), 0.75 (d, 3H,  $J$  = 7.0 Hz), 0.93 (d, 3H,  $J$  = 6.5 Hz), 1.06 (m, 9H), 1.25-1.36 (m, 2H), 1.44-1.60 (m, 2H), 1.72-1.78 (m, 2H), 2.68 (s, 3H), 3.51 (dd, 1H,  $J$  = 6.0, 10.0 Hz), 3.68-3.73 (m, 2H), 4.11 (m, 1H), 4.75 (d, 1H,  $J$  = 9.0 Hz), 5.16 (d, 1H,  $J$  = 5.5 Hz), 7.33 (m, 4H), 7.43-7.52 (m, 7H), 7.75-7.76 (m, 4H); mass spectrum (APCI):  $m/e$  (% relative intensity) 585.3 (M+H)<sup>+</sup> (100), 507.3 (20), 329.2 (80).

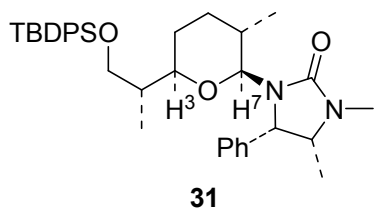

To a solution of **19** (54.0 mg, 0.093 mmol) in anhyd CH<sub>2</sub>Cl<sub>2</sub> (3 mL) was added Crabtree's catalyst (7.50 mg, 0.0093 mmol). This mixture was hydrogenated under 60 *psi* for 2 h at rt. Concentration under reduced pressure and purification of the crude residue via silica gel flash column chromatography (gradient eluent: 10-13% EtOAc in hexanes) afforded pure **31** (40.0 mg, 74%) as a colorless liquid. **31**:  $R_f$  = 0.30 [20% EtOAc/hexanes];  $[\alpha]_D^{25}$  = + 15.2° [ $c$  0.60, CHCl<sub>3</sub>]; <sup>1</sup>H NMR (400 MHz, CDCl<sub>3</sub>)  $\delta$  0.72 (d, 3H,  $J$  = 6.4 Hz), 0.89 (d, 3H,  $J$  = 6.8 Hz), 1.03 (s, 9H), 1.05 (d, 3H,  $J$  = 7.6 Hz), 1.13 (m, 1H), 1.28 (m, 1H), 1.48 (m, 1H), 1.74-1.80 (m, 2H), 1.97 (m, 1H), 2.76 (s, 3H), 3.28-3.32 (m, 2H), 3.45 (dd, 1H,  $J$  = 6.0, 10.0 Hz), 3.70 (dd, 1H,  $J$  = 6.4, 8.4 Hz), 4.46 (d, 1H,  $J$  =

8.4 Hz), 4.65 (d, 1H,  $J$  = 8.8 Hz), 7.14 (m, 4 H), 7.37-7.43 (m, 6H), 7.61-7.66 (m, 5H);  $^{13}\text{C}$  NMR (100 MHz,  $\text{CDCl}_3$ )  $\delta$  11.5, 14.7, 17.2, 19.3, 26.9, 28.5, 28.7, 32.35, 32.43, 40.6, 56.3, 59.9, 65.9, 77.6, 88.0, 127.4, 127.5, 127.53, 127.56, 127.60, 128.5, 129.40, 129.42, 133.9, 134.2, 135.6, 135.7, 137.7, 160.7. IR (neat)  $\text{cm}^{-1}$  293m, 1706s, 1429m; mass spectrum (APCI):  $m/e$  (% relative intensity) 585.3 ( $\text{M}+\text{H}$ ) $^+$  (100), 507.2 (15), 329.2 (20); HRMS (MALDI) calcd for  $\text{C}_{36}\text{H}_{48}\text{N}_2\text{O}_3\text{SiNa}$  ( $\text{M}+\text{Na}$ ) $^+$  607.3326, found 607.3511.

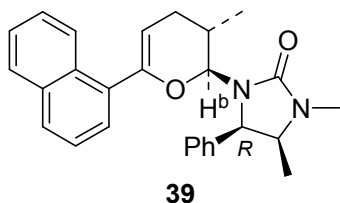

To a solution of **37** (20.0 mg, 0.050 mmol) in anhyd  $\text{CH}_2\text{Cl}_2$  (1.5 mL) was added Crabtree's catalyst (4.00 mg, 0.005 mmol). This mixture was hydrogenated under 45 *psi* for 40 min at rt. Concentration under reduced pressure and purification of the crude residue via silica gel flash column chromatography (gradient eluent: 10-20% EtOAc in hexanes) afforded **39** (13.0 mg, 65%) as a colorless oil. **39**:  $R_f$  = 0.30 [33% EtOAc/hexanes];  $[\alpha]_{\text{D}}^{25}$  = - 64.1 $^\circ$  [ $c$  1.10,  $\text{CHCl}_3$ ];  $^1\text{H}$  NMR (500 MHz,  $\text{CDCl}_3$ )  $\delta$  0.80 (d, 3H,  $J$  = 6.0 Hz), 0.81 (d, 3H,  $J$  = 6.0 Hz), 1.04 (m, 1H), 2.09 (ddd, 1H,  $J$  = 2.0, 10.5, 17.5 Hz), 2.77 (ddd, 1H,  $J$  = 5.5, 5.5, 17.5 Hz), 2.79 (s, 3H), 3.80 (dq, 1H,  $J$  = 6.5, 9.0 Hz), 4.94 (d, 1H,  $J$  = 9.0 Hz), 5.01 (dd, 1H,  $J$  = 2.5, 5.5 Hz), 5.65 (d, 1H,  $J$  = 10.0 Hz), 7.32-7.59 (m, 9H), 7.86 (d, 1H,  $J$  = 8.0 Hz), 7.89 (d, 1H,  $J$  = 8.0 Hz), 8.26 (d, 1H,  $J$  = 8.5 Hz);  $^{13}\text{C}$  NMR (100 MHz,  $\text{CDCl}_3$ )  $\delta$  15.3, 17.5, 28.9, 29.9, 30.7, 57.1, 58.3, 87.0, 101.2, 125.4, 125.9, 126.2, 126.5, 126.8, 128.32, 128.35, 128.4, 128.87, 131.68, 133.86, 135.0, 138.7, 152.4, 162.8; IR (neat)  $\text{cm}^{-1}$  2928m, 1711s, 1428m, 1395m; mass spectrum (APCI):  $m/e$  (% relative intensity) 413.2 (100) ( $\text{M}+\text{H}$ ) $^+$ , 213.2 (70); HRMS (MALDI) calcd for  $\text{C}_{27}\text{H}_{27}\text{N}_2\text{O}_2$  ( $\text{M}+\text{H}$ ) $^+$  413.2229, found 413.2212.

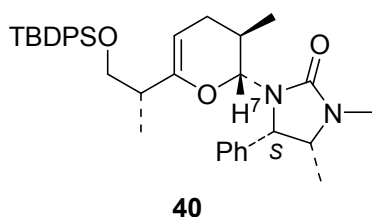

To a solution of **17** (20.0 mg, 0.035 mmol) in anhyd  $\text{CH}_2\text{Cl}_2$  (1.2 mL) was added Crabtree's catalyst (2.80 mg, 0.0035 mmol). This mixture was hydrogenated under 60 *psi* for 1 h at rt. Concentration under reduced pressure and purification of the crude residue via silica gel flash column chromatography (gradient eluent: 10-17% EtOAc in hexanes) afforded pure **40** (10.0 mg, 50%) as a colorless oil. **40**:  $R_f$  = 0.50 [33% EtOAc/hexanes];  $[\alpha]_{\text{D}}^{25}$  = + 17.6 $^\circ$  [ $c$  1.00,  $\text{CH}_2\text{Cl}_2$ ];  $^1\text{H}$  NMR (400 MHz,  $\text{CDCl}_3$ )  $\delta$  0.60 (d, 3H,  $J$  = 6.4 Hz), 0.74 (d, 3H,  $J$  = 6.4 Hz), 1.06 (d, 3H,  $J$  = 6.4 Hz), 1.07 (s, 9H), 1.47 (dq, 1H,  $J$  = 7.0, 10.4 Hz), 1.70 (dd, 1H,  $J$  = 12.0, 17.2 Hz), 1.89 (ddd, 1H,  $J$  = 5.6, 5.6, 16.4 Hz), 2.37 (m, 1H), 2.75 (s, 3H), 3.51 (dd, 1H,  $J$  = 3.6, 9.6 Hz), 3.68 (dq, 1H,  $J$  = 6.8, 9.2 Hz), 3.78 (d,

1H,  $J = 6.0, 9.6$  Hz), 4.40 (dd, 1 H,  $J = 2.0, 5.6$  Hz), 4.63 (d, 1H,  $J = 8.8$  Hz), 5.15 (d, 1H,  $J = 10.4$  Hz), 7.14-7.23 (m, 4H), 7.37-7.52 (m, 7H), 7.69 (m, 4H);  $^{13}\text{C}$  NMR (100 MHz,  $\text{CDCl}_3$ )  $\delta$  15.3, 15.4, 17.4, 19.7, 27.2, 28.9, 29.6, 29.8, 41.1, 57.3, 58.3, 67.0, 86.3, 94.7, 127.87, 127.88, 128.1, 128.3, 128.8, 129.8, 134.3, 134.5, 135.9, 135.92, 138.6, 155.0, 162.8; IR (neat)  $\text{cm}^{-1}$  2959s, 1712s, 1472m, 1427s, 1390m; mass spectrum (APCI):  $m/e$  (% relative intensity) 583.3 (100) ( $\text{M}+\text{H}$ ) $^+$ , 327.2 (80), 231.2 (60); HRMS (MALDI) calcd for  $\text{C}_{36}\text{H}_{46}\text{N}_2\text{O}_3\text{NaSi}$  ( $\text{M}+\text{Na}$ ) $^+$  605.3170, found 605.3174.

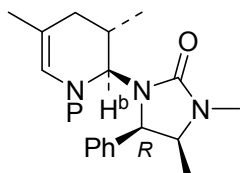

**43:** P =  $\text{SO}_2\text{Ph}$

To a solution of **41** (15.0 mg, 0.034 mmol) in anhyd  $\text{CH}_2\text{Cl}_2$  (1.5 mL) was added Crabtree's catalyst (3.00 mg, 0.0038 mmol). This mixture was hydrogenated under 60 *psi* for 24 h at rt. Concentration under reduced pressure and purification of the crude residue via silica gel flash column chromatography (gradient eluent: 10-20% EtOAc in hexanes) afforded pure **43** (5.60 mg, 37%) as a white solid. **43:**  $R_f = 0.40$  [50% EtOAc/hexanes]; mp 148-151  $^\circ\text{C}$ ;  $[\alpha]_{\text{D}}^{25} = -65.1^\circ$  [ $c$  0.31,  $\text{CH}_2\text{Cl}_2$ ];  $^1\text{H}$  NMR (400 MHz,  $\text{CDCl}_3$ )  $\delta$  0.35 (d, 3H,  $J = 7.2$  Hz), 0.71 (d, 3H,  $J = 6.4$  Hz), 0.95 (m, 2H), 1.35 (d, 3H,  $J = 0.8$  Hz), 1.70 (m, 1H), 2.74 (s, 3H), 3.76 (dd, 1H,  $J = 6.4, 8.8$  Hz), 4.65 (d, 1H,  $J = 9.2$  Hz), 5.36 (d, 1H,  $J = 3.6$  Hz), 6.49 (d, 1H,  $J = 0.8$  Hz), 7.20-7.29 (m, 5H), 7.49-7.60 (m, 3H), 7.86-7.90 (m, 2H);  $^{13}\text{C}$  NMR (100 MHz,  $\text{CDCl}_3$ )  $\delta$  15.3, 18.4, 20.9, 29.1, 30.1, 32.2, 57.6, 58.9, 67.6, 115.5, 117.4, 127.5, 128.0, 129.3, 133.2, 138.7, 139.5, 162.9; IR (neat)  $\text{cm}^{-1}$  2967m, 2918m, 2851m, 1697s, 1686s, 1478s, 1400s, 1367s, 1312s; mass spectrum (APCI):  $m/e$  (% relative intensity) 440.2 (100) ( $\text{M}+\text{H}$ ) $^+$ ; HRMS (MALDI) calcd for  $\text{C}_{24}\text{H}_{29}\text{N}_3\text{O}_3\text{S}$  ( $\text{M}+\text{H}$ ) $^+$  462.1827, found 462.1822.

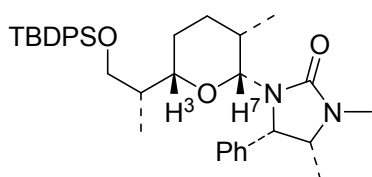

**26**

A heterogeneous mixture of Pt/Alumina (5%w/w, 80.0 mg, 0.020 mmol) and **19** (60.0 mg, 0.10 mmol) in hexanes (5 mL) was hydrogenated under 1500 *psi* in a high-pressure bomb at rt for 3 d. After which, the catalyst was filtered and washed with EtOAc (10 mL). Concentration under reduced pressure and purification of the crude residue via silica gel flash column chromatography (gradient eluent: 10-17% EtOAc in hexanes) afforded pure **26** (31.0 mg, 50%) as a colorless oil. **26:**  $R_f = 0.50$  [33% EtOAc/hexanes];  $[\alpha]_{\text{D}}^{25} = +49.8^\circ$  [ $c$  1.00,  $\text{CH}_2\text{Cl}_2$ ];  $^1\text{H}$  NMR (500 MHz,  $\text{CDCl}_3$ )  $\delta$  0.62 (d, 3H,  $J = 6.5$  Hz), 0.69 (d, 3H,  $J = 6.5$  Hz), 0.96 (d, 3H,  $J = 7.0$  Hz), 1.11 (s, 9H), 1.20-1.30 (m, 2H), 1.49 (ddd, 1H,  $J = 2.0, 6.0, 13.0$  Hz), 1.71-1.80 (m, 2H), 1.93 (m, 1H), 2.70 (s, 3H), 3.50-3.60 (m, 3H), 3.75 (dd, 1H,  $J = 5.5, 10.0$  Hz), 4.65 (d, 1H,  $J = 8.5$  Hz), 5.15 (d, 1H,  $J = 2.0$  Hz), 7.26-7.30 (m, 4 H),

7.42-7.48 (m, 7H), 7.26-7.30 (m, 4H);  $^{13}\text{C}$  NMR (125 MHz,  $\text{CDCl}_3$ )  $\delta$  12.6, 13.1, 15.5, 19.6, 22.3, 27.2, 28.9, 31.5, 31.6, 41.3, 57.8, 58.8, 66.1, 80.1, 86.5, 127.5, 127.8, 127.9, 129.8, 134.40, 134.44, 135.94, 135.95, 135.96, 136.00, 139.8, 168.2; IR (neat)  $\text{cm}^{-1}$  2962s, 1708s, 1472m, 1427s, 1390s; mass spectrum (APCI):  $m/e$  (% relative intensity) 585.2 (100) ( $\text{M}+\text{H}$ ) $^+$ , 507.3 (30), 431.4 (20), 329.3 (80), 191.2 (30), 101.1 (90); HRMS (MALDI) calcd for  $\text{C}_{36}\text{H}_{48}\text{N}_2\text{O}_3\text{SiNa}$  ( $\text{M}+\text{Na}$ ) $^+$  607.3332, found 607.3300.

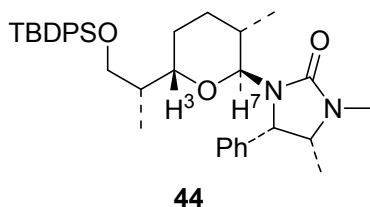

A heterogeneous mixture of Pt/Alumina (5%w/w, 6.00 mg, 0.0015 mmol) and **28** (9.0 mg, 0.015 mmol) in hexanes (1 mL) was hydrogenated under 1500 *psi* in a high-pressure bomb at rt for 6 d. After which, the catalyst was filtered and washed with EtOAc (10 mL). Concentration under reduced pressure and purification of the crude residue via silica gel flash column chromatography (gradient eluent: 10-17% EtOAc in hexanes) afforded pure **44** (89:11 at C3, 3.00 mg, 30%) as a colorless oil. **26**:  $R_f$  = 0.40 [33% EtOAc/hexanes];  $[\alpha]_D^{25}$  = + 65.3° [ $c$  0.40,  $\text{CHCl}_3$ ];  $^1\text{H}$  NMR (500 MHz,  $\text{CDCl}_3$ )  $\delta$  0.69 (d, 3H,  $J$  = 6.5 Hz), 0.93 (d, 3H,  $J$  = 6.5 Hz), 0.97 (d, 3H,  $J$  = 6.5 Hz), 1.13 (s, 9H), 1.16-1.23 (m, 1H), 1.57-1.62 (m, 1H), 1.68-1.80 (m, 2H), 1.87 (m, 1H), 2.80 (s, 3H), 3.00-3.06 (m, 1H), 3.55 (dq, 1H,  $J$  = 6.5, 6.5 Hz), 3.62 (dd, 1H,  $J$  = 3.5, 10.0 Hz), 3.73 (dd, 1H,  $J$  = 4.5, 10.0 Hz), 3.89 (ddd, 1H,  $J$  = 4.5, 4.5, 9.5 Hz), 4.17 (d, 1H,  $J$  = 8.0 Hz), 4.55 (d, 1H,  $J$  = 8.5 Hz), 7.22-7.27 (m, 3 H), 7.41-7.51 (m, 8H), 7.75 (d, 2H,  $J$  = 6.5 Hz), 7.79 (d, 2H,  $J$  = 6.5 Hz);  $^{13}\text{C}$  NMR (100 MHz,  $\text{CDCl}_3$ )  $\delta$  14.0, 14.8, 18.0, 19.6, 24.9, 27.1, 27.3, 28.6, 30.7, 35.4, 55.4, 61.5, 65.2, 73.3, 84.8, 127.8, 127.84, 128.0, 128.3, 129.7, 129.8, 134.2, 134.3, 136.0, 136.1, 136.6, 160.8; IR (neat)  $\text{cm}^{-1}$  2979s, 1709s, 1472m, 1388s; mass spectrum (APCI):  $m/e$  (% relative intensity) 585.3 (80) ( $\text{M}+\text{H}$ ) $^+$ , 507.2 (20), 329.3 (100), 191.2 (20); HRMS (MALDI) calcd for  $\text{C}_{36}\text{H}_{48}\text{N}_2\text{O}_3\text{SiNa}$  ( $\text{M}+\text{Na}$ ) $^+$  607.3326, found 607.3332.

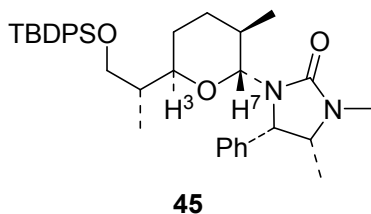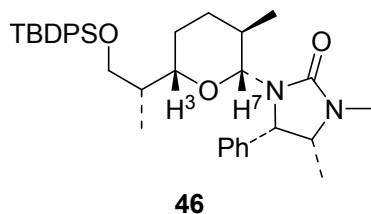

A heterogeneous mixture of Pt/Alumina (5%w/w, 67.0 mg, 0.017 mmol) and **40** (50.0 mg, 0.086 mmol) in hexanes (4 mL) was hydrogenated under 1500 *psi* in a high-pressure bomb at rt for 6 d. After which, the catalyst was filtered and washed with EtOAc (10 mL). Concentration under reduced pressure and purification of the crude residue via silica gel flash column chromatography (gradient eluent: 8-20% EtOAc in hexanes) afforded pure **46** (8.00 mg, 16%) and **45** (17.0 mg, 34%) as colorless oil. **45**:  $R_f$  = 0.45 [33% EtOAc/hexanes];  $[\alpha]_D^{23}$  = + 5.10° [ $c$  0.35,  $\text{CH}_2\text{Cl}_2$ ];  $^1\text{H}$  NMR (400

MHz, CDCl<sub>3</sub>)  $\delta$  0.55 (d, 3H,  $J$  = 6.0 Hz), 0.73 (d, 3H,  $J$  = 6.8 Hz), 1.04 (s, 9H), 1.06 (d, 3H,  $J$  = 6.8 Hz), 1.10-1.28 (m, 2H), 1.38-1.43 (m, 1H), 1.53-1.60 (m, 2H), 2.10-2.17 (m, 1H), 2.75 (s, 3H), 3.47 (dd, 1H,  $J$  = 4.8, 10.4 Hz), 3.54 (dd, 1H,  $J$  = 4.4, 10.4 Hz), 3.75-3.79 (m, 1H), 3.82 (dq, 1H,  $J$  = 8.8, 6.4 Hz), 4.85 (d, 1H,  $J$  = 9.2 Hz), 4.95 (d, 1H,  $J$  = 10.0 Hz), 7.28 (m, 5H), 7.35-7.44 (m, 6H), 7.62-7.65 (m, 4H); <sup>13</sup>C NMR (100 MHz, CDCl<sub>3</sub>)  $\delta$  14.1, 15.3, 17.7, 19.5, 26.2, 27.1, 27.6, 29.0, 32.8, 35.0, 57.2, 57.9, 66.8, 76.0, 82.4, 127.79, 127.85, 128.0, 128.2, 128.6, 129.8, 133.9, 135.83, 135.86, 135.93, 139.13, 162.95; IR (neat) cm<sup>-1</sup> 2931s, 2858s, 1711s, 1427m, 1395s; mass spectrum (APCI):  $m/e$  (% relative intensity) 585.4 (55) (M+H)<sup>+</sup>, 391.1 (40), 197.1 (70), 120.1 (75), 101.0 (100); HRMS (MALDI) calcd for C<sub>36</sub>H<sub>48</sub>N<sub>2</sub>O<sub>3</sub>SiNa (M+Na)<sup>+</sup> 607.3326, found 602.3347.

**46:**  $R_f$  = 0.52 [33% EtOAc/hexanes];  $[\alpha]_D^{23}$  = +31.0° [ $c$  0.12, CH<sub>2</sub>Cl<sub>2</sub>]; <sup>1</sup>H NMR (400 MHz, CDCl<sub>3</sub>)  $\delta$  0.54 (d, 3H,  $J$  = 6.4 Hz), 0.72 (d, 3H,  $J$  = 6.8 Hz), 0.95 (d, 3H,  $J$  = 6.8 Hz), 1.05 (s, 9H), 1.06-1.09 (m, 2H), 1.24-1.27 (m, 1H), 1.43-1.46 (m, 1H), 1.60-1.63 (m, 1H), 1.84-1.94 (m, 1H), 2.68 (s, 3H), 3.35-3.39 (m, 1H), 3.48 (dd, 1H,  $J$  = 7.6, 10.0 Hz), 3.57 (dq, 1H,  $J$  = 9.2, 6.8 Hz), 3.75 (dd, 1H,  $J$  = 5.6, 10.0 Hz), 4.68 (d, 1H,  $J$  = 10.4 Hz), 4.72 (d, 1H,  $J$  = 9.2 Hz), 7.20-7.23 (m, 2H), 7.35-7.44 (m, 8H), 7.66-7.68 (m, 5H); <sup>13</sup>C NMR (100 MHz, CDCl<sub>3</sub>)  $\delta$  13.1, 15.3, 17.2, 19.6, 27.1, 27.3, 27.9, 29.0, 32.2, 33.7, 41.2, 57.3, 66.1, 78.6, 87.8, 127.8, 127.84, 128.0, 128.2, 128.7, 129.7, 134.2, 134.4, 135.9, 139.1, 162.9; IR (neat) cm<sup>-1</sup> 2932s, 2858s, 1714s, 1429m, 1398s; mass spectrum (APCI):  $m/e$  (% relative intensity) 585.2 (100) (M+H)<sup>+</sup>, 391.3 (30), 329.1 (65), 120.1 (75), 101.2 (80); HRMS (MALDI) calcd for C<sub>36</sub>H<sub>48</sub>N<sub>2</sub>O<sub>3</sub>SiNa (M+Na)<sup>+</sup> 607.3327, found: 607.3333.

### Crotylations and Oxidations.

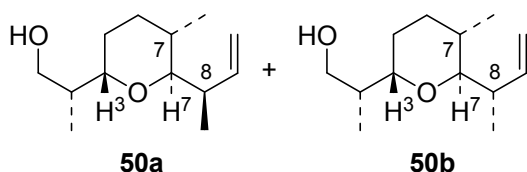

To a solution of **26** (340.0 mg, 0.58 mmol) and *Z*-crotylsilane (270.0  $\mu$ L, 1.74 mmol) in CH<sub>2</sub>Cl<sub>2</sub> (30 mL) was added SnBr<sub>4</sub> (1.13 g, 2.32 mmol) at -78 °C. Reaction was warmed to -35 °C slowly and stirred at this temperature for 24 h with exposure to the air. Then the mixture was quenched by adding sat aq NaHCO<sub>3</sub> (10 mL), and extracted with CH<sub>2</sub>Cl<sub>2</sub> (3  $\times$  50 mL). The combined organic phases were washed with sat aq NaCl (2  $\times$  15 mL), dried over Na<sub>2</sub>SO<sub>4</sub>, and concentrated under reduced pressure. Purification of the crude residue via silica gel flash column chromatography (gradient eluent: 7-14% EtOAc in hexanes) afforded a mixture of **50a** and **50b** (1:3, 80.0 mg, 65%) as a colorless oil. **50b:**  $R_f$  = 0.30 [20% EtOAc/hexanes]; <sup>1</sup>H NMR (500 MHz, CDCl<sub>3</sub>)  $\delta$  0.84 (d, 3H,  $J$  = 7.0 Hz), 1.04 (d, 3H,  $J$  = 7.0 Hz), 1.06 (d, 3H,  $J$  = 7.0 Hz), 1.35-1.40 (m, 1H), 1.48-1.63 (m, 2H), 1.70-1.88 (m, 3H), 2.71 (m, 1H), 3.19 (dd, 1H,  $J$  = 3.0, 9.0 Hz), 3.41 (bs, 1H), 3.47 (ddd, 1H,  $J$  = 3.5, 9.0, 9.0 Hz), 3.60 (m, 1H), 5.00 (d, 1H,  $J$  = 10.5 Hz), 5.05 (d, 1H,  $J$  = 16.5 Hz), 5.64 (ddd, 1H,  $J$  = 8.0, 10.0, 17.0 Hz); <sup>13</sup>C NMR (100 MHz, CDCl<sub>3</sub>)  $\delta$  13.9, 16.1, 18.6, 24.9, 25.0, 28.4, 38.3, 39.1, 68.2, 76.5, 81.9, 114.9, 142.1. **50a:** <sup>1</sup>H NMR (500 MHz, CDCl<sub>3</sub>)  $\delta$  0.80 (d, 3H,  $J$  = 6.5 Hz), 0.99 (d, 3H,  $J$  = 7.0 Hz), 1.03 (d, 3H,  $J$  = 7.0 Hz), 1.36-1.41 (m, 1H), 1.50-1.60 (m, 2H), 1.69-1.78 (m, 2H), 1.81-1.87 (m,

1H), 2.65 (m, 1H), 3.06 (dd, 1H,  $J = 4.0, 8.0$  Hz), 3.21 (dd, 1H,  $J = 4.0, 8.0$  Hz), 3.48-3.55 (m, 1H), 3.57 (dd, 1H,  $J = 4.0, 10.6$  Hz), 3.57-3.64 (m, 1H), 5.05 (d, 1H,  $J = 10.0$  Hz), 5.07 (d, 1H,  $J = 15.0$  Hz), 5.84 (ddd, 1H,  $J = 8.5, 10.0, 15.0$  Hz);  $^{13}\text{C}$  NMR (100 MHz,  $\text{CDCl}_3$ )  $\delta$  18.47, 18.50, 25.2, 25.7, 29.1, 38.0, 38.9, 67.7, 76.1, 81.7, 114.6, 141.4; IR (neat)  $\text{cm}^{-1}$  3439s, 2961s, 1640w, 1459s, 1376m; mass spectrum (APCI):  $m/e$  (% relative intensity) 213.3 (100) ( $\text{M}+\text{H}$ ) $^+$ , 195.2 (85), 177.2 (90), 157.2 (30), 139.2 (45); HRMS (ESI) calcd for  $\text{C}_{13}\text{H}_{24}\text{O}_2\text{Na}$  ( $\text{M}+\text{Na}$ ) $^+$  235.1674, found 235.1673.

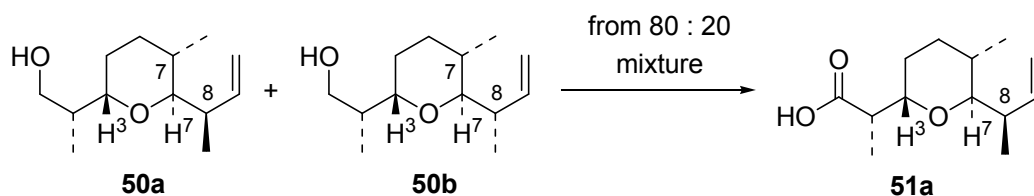

To a solution of a 4:1 mixture of crotylation products **50a** and **50b** (7.00 mg, 0.033 mmol) in  $\text{CH}_2\text{Cl}_2$  (0.5 mL) was added Dess-Martin Periodinane (15.0 mg, 0.035 mmol) at 0 °C. After stirring for 30 min, this mixture was quenched by adding sat aq  $\text{NaHCO}_3$  (0.3 mL), sat aq  $\text{Na}_2\text{S}_2\text{O}_3$  (0.3 mL), and extracted with  $\text{CH}_2\text{Cl}_2$  ( $3 \times 5$  mL). The combined organic phases were dried over  $\text{Na}_2\text{SO}_4$  and concentrated under reduced pressure. Purification of the crude residue via silica gel flash column chromatography (gradient eluent: 5-10% EtOAc in hexanes) afforded the corresponding aldehyde intermediate (4:1, 6-7.0 mg, 96%) as a colorless oil.

To a solution of the aldehyde prepared above (12.0 mg, 0.057 mmol) and 2-Me-2-butene (20.0  $\mu\text{L}$ ) in  $t\text{-BuOH}$  (0.2 mL) and  $\text{H}_2\text{O}$  (0.1 mL) were added  $\text{NaH}_2\text{PO}_4$  (17.0 mg, 0.123 mmol) and  $\text{NaClO}_2$  (20.0 mg, 0.221 mol) at 0°C. After stirring for 5 min, this mixture was quenched by adding sat aq  $\text{NaHCO}_3$  (0.3 mL), sat aq  $\text{Na}_2\text{S}_2\text{O}_3$  (0.3 mL), and extracted with EtOAc ( $3 \times 5$  mL). The combined organic phases were dried over  $\text{Na}_2\text{SO}_4$  and concentrated under reduced pressure. Purification of the crude residue via silica gel flash column chromatography (gradient eluent: 10-50% EtOAc in hexanes, then MeOH) afforded acids **51a** and **51b** (4:1, 11.0 mg, 85%) as a white solid. Crystallization in hexanes afforded pure acid **51a** (5.00 mg). **51a**:  $R_f = 0.40$  [33% EtOAc/hexanes]; mp 88-90 °C;  $[\alpha]_{\text{D}}^{25} = +32.0^\circ$  [ $c$  0.40,  $\text{CH}_2\text{Cl}_2$ ];  $^1\text{H}$  NMR (500 MHz,  $\text{CDCl}_3$ )  $\delta$  0.95 (d, 3H,  $J = 6.5$  Hz), 1.00 (d, 3H,  $J = 7.0$  Hz), 1.14 (d, 3H,  $J = 7.0$  Hz), 1.29-1.36 (m, 1H), 1.62-1.71 (m, 4H), 2.54 (ddq, 1H,  $J = 6.0, 9.0, 7.0$  Hz), 2.83 (dq, 1H,  $J = 7.0, 10.0$  Hz), 3.30 (dd, 1H,  $J = 6.0, 6.0$  Hz), 3.87 (ddd, 1H,  $J = 5.0, 5.0, 10.0$  Hz), 5.00 (d, 1H,  $J = 12.0$  Hz), 5.01 (d, 1H,  $J = 15.5$  Hz), 5.81 (ddd, 1H,  $J = 9.0, 12.0, 15.0$  Hz), 10.93 (brs, 1H);  $^{13}\text{C}$  NMR (100 MHz,  $\text{CDCl}_3$ )  $\delta$  14.2, 18.1, 18.13, 24.9, 26.1, 30.5, 39.1, 41.6, 73.6, 81.3, 114.9, 140.4, 178.9; IR (neat)  $\text{cm}^{-1}$  2930s, 1711s, 1460s, 1378m; mass spectrum (APCI):  $m/e$  (% relative intensity) 227.2 (100) ( $\text{M}+\text{H}$ ) $^+$ , 209.2 (65), 153.2 (45). HRMS (ESI) calcd for  $\text{C}_{13}\text{H}_{22}\text{O}_3\text{Na}$  ( $\text{M}+\text{Na}$ ) $^+$  249.1467, found 249.1467.

**51b**:  $^1\text{H}$  NMR (500 MHz,  $\text{CDCl}_3$ )  $\delta$  1.008 (d, 3H,  $J = 6.8$  Hz), 1.02 (d, 3H,  $J = 6.0$  Hz), 1.15 (d, 3H,  $J = 7.2$  Hz), 1.32-1.41 (m, 1H), 1.54-1.59 (m, 2H), 1.61-1.66 (m, 1H), 1.73-1.81 (m, 1H), 2.63-2.71 (m, 2H), 3.25 (dd, 1H,  $J = 3.6, 8.0$  Hz), 3.77 (ddd, 1H,  $J = 6.8, 6.8, 6.8$  Hz), 4.96 (d, 1H,  $J = 10.4$  Hz), 5.02 (d, 1H,  $J = 16.0$  Hz), 5.64 (ddd, 1H,  $J = 8.0, 10.0, 17.2$  Hz), 11.51 (brs, 1H);  $^{13}\text{C}$  NMR (100

MHz, CDCl<sub>3</sub>)  $\delta$  13.8, 15.8, 18.5, 23.9, 25.2, 28.7, 38.5, 44.1, 72.5, 81.9, 114.5, 142.2, 180.4.

### Esterification of **51a** and **51b**.

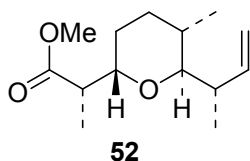

To a solution of a 1:3 mixture of acids **51a** and **51b** (36.0 mg, 0.16 mmol) in toluene (1 mL) and MeOH (0.5 mL) was added TMSCHN<sub>2</sub> (100.0  $\mu$ L, 2.0 M in Et<sub>2</sub>O, 0.19 mmol) at rt. After stirring for 30 min, this mixture was concentrated under reduced pressure. Purification of the crude residue via silica gel flash column chromatography (gradient eluent: 10-13% EtOAc in hexanes) afforded ester **52** (1:3, 34.0 mg, 90%) as a colorless oil. **52**:  $R_f$  = 0.60 [20% EtOAc/hexanes]; <sup>1</sup>H NMR (400 MHz, CDCl<sub>3</sub>)  $\delta$  0.87 (d, 3H,  $J$  = 6.4 Hz), 0.96 (d, 3H,  $J$  = 6.8 Hz), 0.97 (d, 3H,  $J$  = 6.4 Hz), 1.00 (d, 3H,  $J$  = 6.8 Hz), 1.07 (d, 3H,  $J$  = 7.2 Hz), 1.08 (d, 3H,  $J$  = 7.2 Hz), 1.20-1.78 (m, 10H), 2.41-2.49 (m, 1H), 2.62 (ddq, 1 H,  $J$  = 7.2, 7.2, 7.2 Hz), 2.83 (dq, 1 H,  $J$  = 7.2, 9.2 Hz), 2.98 (dq, 1 H,  $J$  = 6.8, 10.4 Hz), 3.19 (dd, 1 H,  $J$  = 4.4, 8.0 Hz), 3.21 (m, 1H), 3.68 (s, 6H), 3.76 (ddd, 1H,  $J$  = 4.4, 7.6, 9.2 Hz), 3.89-3.93 (m, 1H), 4.92-5.02 (m, 4H), 5.64 (ddd, 1H,  $J$  = 8.4, 10.4, 17.2 Hz), 5.83 (ddd, 1H,  $J$  = 10.0, 10.0, 18.0 Hz); <sup>13</sup>C NMR (100 MHz, CDCl<sub>3</sub>)  $\delta$  13.9, 14.5, 15.4, 17.9, 18.0, 18.5, 23.9, 24.9, 25.6, 27.0, 29.0, 31.8, 38.6, 39.4, 40.8, 43.9, 51.7, 51.8, 73.0, 74.6, 80.1, 81.3, 114.0, 114.6, 140.4, 142.7, 175.9, 176.1; IR (neat) cm<sup>-1</sup> 2951s, 1739s, 1460m, 1376m; mass spectrum (APCI):  $m/e$  (% relative intensity) 241.2 (100) (M+H)<sup>+</sup>, 223.2 (30), 209.2 (20). HRMS (ESI) calcd for C<sub>14</sub>H<sub>24</sub>O<sub>3</sub>Na (M+Na)<sup>+</sup> 263.1623, found 263.1620.

### Dihydroxylation of **52**.

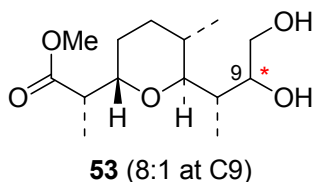

To a solution of the above ester **52** (34.0 mg, 0.14 mmol) and NMO (17.0 mg, 1.46 mmol) in acetone (0.8 mL) and water (80  $\mu$ L) was added catalytic amount of OsO<sub>4</sub> at 0°C. After stirring for 2 h at rt, then the mixture was quenched with sat aq Na<sub>2</sub>S<sub>2</sub>O<sub>3</sub> (0.5 mL), and extracted with EtOAc (5  $\times$  8 mL). The combined organic phases were dried over Na<sub>2</sub>SO<sub>4</sub>, and concentrated under reduced pressure. Purification of the crude residue via silica gel flash column chromatography (gradient eluent: 10-33% EtOAc in hexanes) afforded diol **53** (**major**: 8:1 at C9, 23.0 mg, 60%, **minor**: 7.00 mg, 20%) as colorless oil. **53**:  $R_f$  = 0.40 [50% EtOAc/hexanes]; [ $\alpha$ ]<sub>D</sub><sup>25</sup> = + 48.9° [ $c$  0.80, CHCl<sub>3</sub>]; <sup>1</sup>H NMR (400 MHz, CDCl<sub>3</sub>)  $\delta$  0.80 (d, 3H,  $J$  = 6.0 Hz), 0.81 (d, 3H,  $J$  = 5.2 Hz), 1.08 (d, 3H,  $J$  = 6.8 Hz), 1.22-1.30 (m, 1H), 1.54-1.64 (m, 3H), 1.54-1.64 (m, 4H), 2.46 (dd, 1 H,  $J$  = 2.8, 8.8 Hz), 3.18 (dq, 1 H,  $J$  = 6.8, 10.0 Hz), 3.42-3.53 (m, 2H), 3.63-3.71 (m, 2H), 3.73 (s, 3H), 3.95 (dd, 1H,  $J$  = 5.2, 11.2 Hz), 4.05 (d, 1H,  $J$  = 5.2 Hz); <sup>13</sup>C NMR (100 MHz, CDCl<sub>3</sub>)  $\delta$  9.1, 14.3, 17.8, 25.5, 27.6, 31.8, 37.1, 40.3, 52.5, 65.3, 72.6, 75.0, 75.5, 177.3; IR (neat) cm<sup>-1</sup> 3453s, 2951s, 1736s, 1459m, 1380m; mass spectrum (APCI):

m/e (% relative intensity) 275.2 (100) (M+H)<sup>+</sup>, 257.2 (50), 239.2 (40); HRMS (MALDI) calcd for C<sub>14</sub>H<sub>26</sub>O<sub>5</sub>Na (M+Na)<sup>+</sup> 297.1673, found 297.1679.

### Intercepting Cossy's Intermediate.

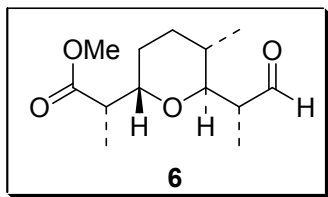

To a solution of diol **53** (15.0 mg, 0.055 mmol) in anhyd CH<sub>2</sub>Cl<sub>2</sub> (2.0 mL) was added Pb(OAc)<sub>4</sub> (41.0 mg, 0.093 mmol) at – 20°C. After stirring for 5 min, then the mixture was quenched with sat aq Na<sub>2</sub>S<sub>2</sub>O<sub>3</sub> (0.5 mL) and sat aq NaHCO<sub>3</sub> (0.5 mL), and extracted with Et<sub>2</sub>O (3 × 8 mL). The combined organic phases were dried over Na<sub>2</sub>SO<sub>4</sub>, and concentrated under reduced pressure. Purification of the crude residue via silica gel flash column chromatography (gradient eluent: 5-10% EtOAc in hexanes) afforded **6** (7.00 mg, 53%) as colorless oil. **6**: *R*<sub>f</sub> = 0.50 [33% EtOAc/hexanes]; [α]<sub>D</sub><sup>25</sup> = + 2.0° [*c* 0.40, CHCl<sub>3</sub>]; <sup>1</sup>H NMR (400 MHz, CDCl<sub>3</sub>) δ 0.91 (d, 3H, *J* = 6.4 Hz), 1.04 (d, 3H, *J* = 7.2 Hz), 1.06 (d, 3H, *J* = 7.2 Hz), 1.36 (m, 1H), 1.58-1.78 (m, 4H), 2.56 (qdd, *J* = 7.2, 4.0, 0.8 Hz, 1H), 3.04 (dq, *J* = 10.8, 7.2 Hz, 1H), 3.66 (s, 3H), 3.86 (m, 1H), 3.90 (dd, *J* = 8.8, 4.0 Hz, 1H), 9.55 (d, *J* = 0.8 Hz, 1H); <sup>13</sup>C NMR (100 MHz, CDCl<sub>3</sub>) δ 6.3, 14.2, 17.6, 24.7, 26.6, 31.1, 40.6, 47.8, 51.7, 75.0, 75.3, 175.4, 204.5; IR (neat) cm<sup>-1</sup> 2953s, 1737s, 1461m, 1379m; mass spectrum (APCI): m/e (% relative intensity) 243.2 (10) (M+H)<sup>+</sup>, 225.2 (100), 207.2 (50), 185.2 (80); HRMS (MALDI) calcd for C<sub>13</sub>H<sub>22</sub>O<sub>4</sub>Na (M+Na)<sup>+</sup> 265.1410, found 265.1410.

### Matching of Our Aldehyde 6 with Cossy's Intermediate.

| Cossy's Intermediate [ppm]                                   | Ours                                                         | $\Delta - [\alpha]_D^{25}$ |
|--------------------------------------------------------------|--------------------------------------------------------------|----------------------------|
| $[\alpha]_D^{20} = + 7.0^\circ$ (c 0.70, CHCl <sub>3</sub> ) | $[\alpha]_D^{25} = + 2.0^\circ$ (c 0.40, CHCl <sub>3</sub> ) | + 5°                       |

### <sup>1</sup>H NMR

| Cossy's Intermediate [ppm]             | Ours [ppm]                             | $\Delta\delta$           |
|----------------------------------------|----------------------------------------|--------------------------|
| 0.92 (d, $J = 6.6$ Hz, 3H)             | 0.91 (d, $J = 6.4$ Hz, 3H)             | 0.01 ppm; 0.2 Hz         |
| 1.05 (d, $J = 7.0$ Hz, 3H)             | 1.04 (d, $J = 7.2$ Hz, 3H)             | 0.01 ppm; 0.2 Hz         |
| 1.07 (d, $J = 7.4$ Hz, 3H)             | 1.06 (d, $J = 7.2$ Hz, 3H)             | 0.01 ppm; 0.2 Hz         |
| 1.32 (m, 1H)                           | 1.36 (m, 1H)                           | 0.04 ppm                 |
| 1.55-1.79 (m, 4H)                      | 1.58-1.78 (m, 4H)                      | 0.01-0.03 ppm            |
| 2.56 (qdd, $J = 7.0, 4.0, 1.1$ Hz, 1H) | 2.56 (qdd, $J = 7.2, 4.0, 0.8$ Hz, 1H) | 0.00 ppm; 0.2 Hz, 0.0 Hz |
| 3.05 (dq, $J = 10.7, 7.0$ Hz, 1H)      | 3.04 (dq, $J = 10.8, 7.2$ Hz, 1H)      | 0.01 ppm; 0.1 Hz, 0.2 Hz |
| 3.67 (s, 3H)                           | 3.66 (s, 3H)                           | 0.01 ppm                 |
| 3.87 (m, 1H)                           | 3.86 (m, 1H)                           | 0.01 ppm                 |
| 3.91 (dd, $J = 8.8, 4.0$ Hz, 1H)       | 3.90 (dd, $J = 8.8, 4.0$ Hz, 1H)       | 0.01 ppm; 0.0 Hz, 0.0 Hz |
| 9.56 (d, $J = 1.1$ Hz, 1H)             | 9.55 (d, $J = 0.8$ Hz, 1H)             | 0.01 ppm; 0.3 Hz         |

### <sup>13</sup>C NMR

| Cossy [ppm] | Ours [ppm] | $\Delta\delta$ [ppm] |
|-------------|------------|----------------------|
| 6.30        | 6.30       | 0.00                 |
| 14.2        | 14.2       | 0.00                 |
| 17.6        | 17.6       | 0.00                 |
| 24.7        | 24.7       | 0.00                 |
| 26.6        | 26.6       | 0.00                 |
| 31.1        | 31.1       | 0.00                 |
| 40.6        | 40.6       | 0.00                 |
| 47.8        | 47.8       | 0.00                 |
| 51.7        | 51.7       | 0.00                 |
| 75.0        | 75.0       | 0.00                 |
| 75.3        | 75.3       | 0.00                 |
| 175.4       | 175.4      | 0.00                 |
| 204.4       | 204.5      | 0.10                 |
